# Supplementary material
Source: publisher site journal article supplement (https://www.dovepress.com/article/440979)
Supplement: Supplementary file 1 [file get_supplementary_file.php]

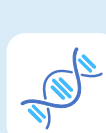

**p53** is known as the 'guardian of the genome' and plays a key role in regulating cell proliferation and apoptosis

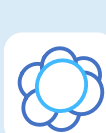

Inactivation of **p53** is a central mechanism for tumors to escape cell death

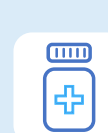

**Brigimadlin** is a potent, orally available small molecule investigational drug that binds to MDM2 and blocks the MDM2-p53 interaction, restoring p53 function

## Targeting MDM2 with brigimadlin

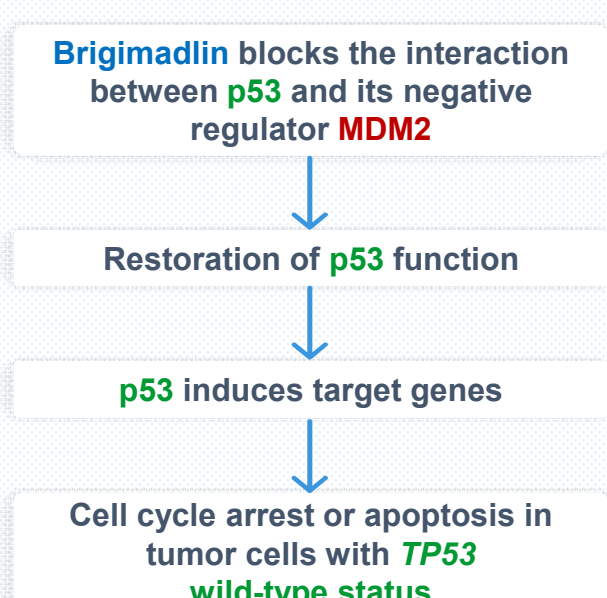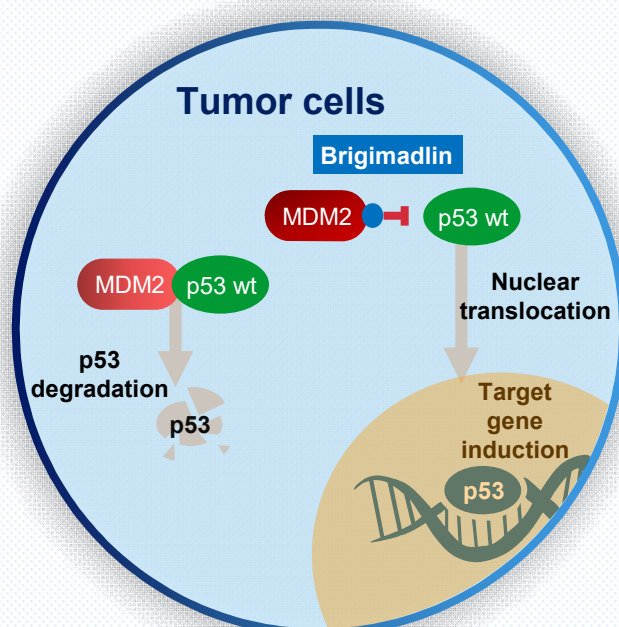

## Brigimadlin may also promote a pro-immunogenic tumor microenvironment to help immune destruction of tumor cells

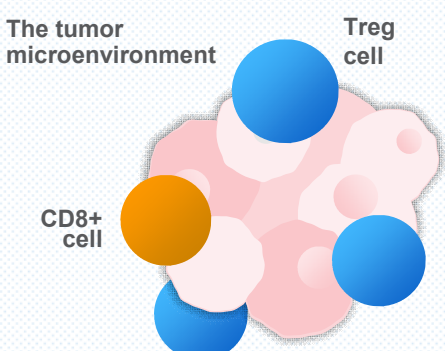

**Brigimadlin** has potential immunomodulatory properties

Preclinical data suggest this effect may be potentiated by combining **brigimadlin** with **immune checkpoint inhibitors** such as BI 754091 (ezabenlimab; a PD-1 inhibitor)

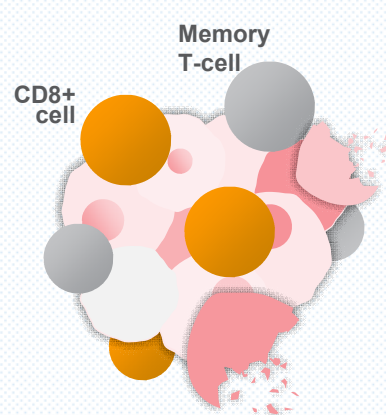

Here we present data from the first 12 patients with biliary tract cancer (BTC) treated with brigimadlin in two ongoing Phase Ia/Ib studies (data cut-off: Patients 1-10, December 2022; Patients 11-12, February 2023), and safety results in the overall populations

## What are the aims of the two studies?

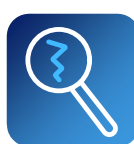

Assess safety, tolerability, and RP2D of **brigimadlin**, both as a monotherapy and in combination with ezabenlimab

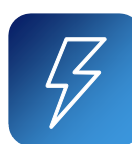

Investigate antitumor activity in patients with advanced **TP53wt, MDM2-amplified** tumors (**TP53wt** only for Cohort 1 in 1403-0002)

## What are the study designs?

### Study 1403-0001 (monotherapy)

#### Phase Ia: dose escalation

| Arm A                                   | Arm B                                     |
|-----------------------------------------|-------------------------------------------|
| Brigimadlin on D1 Q3W (10-80 mg) 29 pts | Brigimadlin on D1/D8 Q4W (5-60 mg) 25 pts |

**Primary endpoint:** MTD based on DLTs  
**Secondary endpoints:** PK, safety, efficacy

#### Phase Ib: dose expansion (150 pts)

|                                |                                         |
|--------------------------------|-----------------------------------------|
| TP53wt MDM2-amplified sarcomas | Other TP53wt MDM2-amplified tumor types |
|--------------------------------|-----------------------------------------|

### Study 1403-0002 (combination)

#### Phase Ia: dose escalation

Brigimadlin (10-45 mg D1 Q3W) + ezabenlimab (240 mg D1 Q3W) + BI 754111 (600 mg D1 Q3W)

Brigimadlin (restart escalation 45 mg D1 Q3W) + ezabenlimab (240 mg D1 Q3W)

**Primary endpoint:** MTD based on DLTs  
**Secondary endpoints:** PK, safety, efficacy

#### Phase Ib: dose expansion (95 pts)

|                            |                                         |
|----------------------------|-----------------------------------------|
| TP53wt soft tissue sarcoma | Other TP53wt MDM2-amplified tumor types |
|----------------------------|-----------------------------------------|

## Patients with BTC who have been enrolled

A total of **12 patients** with BTC have been enrolled across both trials:

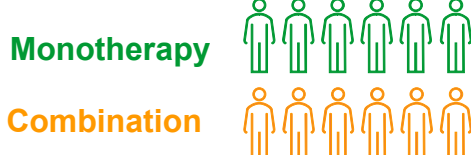

Median age, years:  
70.5 (Monotherapy), 62.5 (Combination)  
Male: 67% (Monotherapy), 67% (Combination)

### Tumor type

- Ampullary carcinoma (n=3)
- Intrahepatic cholangiocarcinoma (n=4 and n=1)
- Cholangiocarcinoma (n=2)
- Gall bladder carcinoma (n=2)

■ Monotherapy study (Q3W) ■ Combination study

## Safety profile of brigimadlin +/- ezabenlimab

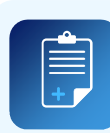

Overall, in the two trials, **102/110 (92.7%)** and **39/42 (92.9%)** experienced  $\geq 1$  TRAE

### Patients with AEs leading to:

- Dose reduction: 29.1% / 26.2%
- Discontinuation: 5.5% / 4.8%

Data from **patients with BTC** treated with **brigimadlin** are consistent with the safety profile seen in the overall population

In the two trials, **44.5%** and **50.0%** of patients had a **grade  $\geq 3$  TRAE**

The most common were:

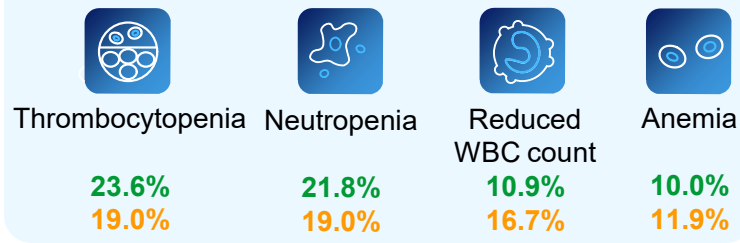

■ Monotherapy study (Q3W) ■ Combination study

## Efficacy of brigimadlin +/- ezabenlimab in patients with BTC

Best response among patients with BTC who received either **brigimadlin** as monotherapy, or in combination with ezabenlimab (n=12)

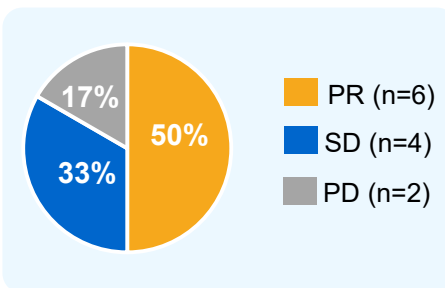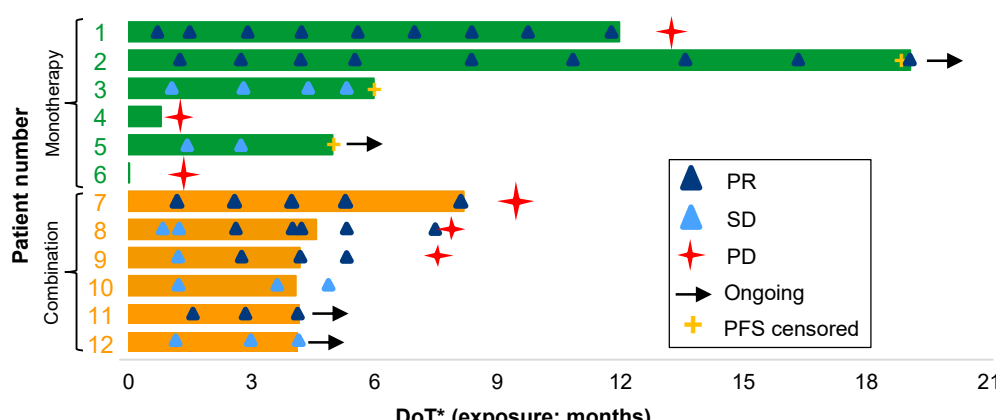

\*Time from first to last drug administration (D1Q3W); dose could be delayed due to AE up to 63 days.

## In summary

Treatment of **brigimadlin +/- ezabenlimab** in patients with BTC showed:

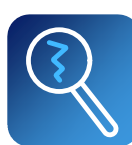

A tolerable safety profile

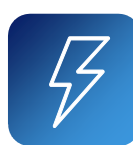

Promising preliminary antitumor activity

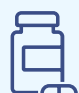

**Brightline-2, a Phase IIa/b trial in patients with BTC, is currently open for recruitment (NCT05512377)**

**Manuscript Authors**  
Noboru Yamamoto, Anthony Tolcher, Navid Hafez, Iwona Lugowska, Rodryg Ramlau, Teresa Macarulla, Junxian Geng, Jian Li, Michael Teufel, Angela Märtens, Patricia LoRusso

**Disclosures**  
This study was funded by Boehringer Ingelheim. This summary is based on the manuscript, entitled "Efficacy and safety of the MDM2-p53 antagonist brigimadlin in patients with advanced biliary tract cancer". The authors were fully responsible for all content and editorial decisions of the associated manuscript.

**Acknowledgments**  
Support for the development of this infographic summary was provided by Steven Kirkham, PhD, of Ashfield MedComms, an Inizio Company, and funded by Boehringer Ingelheim.

**Disclaimer:** These compounds are investigational agents and have not been approved by any regulatory authority

**Boehringer Ingelheim**

**Supplementary Figure 1. An infographic summary of the case series manuscript entitled ‘Efficacy and safety of the MDM2–p53 antagonist brigimadlin (BI 907828) in patients with advanced biliary tract cancer’.**

Abbreviations: AEs, adverse events; BTC, biliary tract cancer; CD8, cluster of differentiation 8; DoT, duration of treatment; D1/8, Day 1/8; DLT, dose-limiting toxicity; MDM2, murine double minute 2 homolog; MTD, maximum tolerated dose; p53, protein 53; PD, progressive disease; PD-1, programmed cell death protein 1; PFS, progression-free survival; PK, pharmacokinetics; PR, partial response; pts, patients; Q3W, every three weeks; RP2D, recommended Phase II dose; SD, stable disease; TP53, tumor protein 53; TRAE, treatment-related AE; Treg, regulatory T-cell; WBC, white blood cell; wt, wild-type
